1    **Genotyping-by-sequencing supports a genetic basis for alpine wing-**  
2    **reduction in a New Zealand stonefly.**

3

4    Andrew J. Veale<sup>1</sup>, Brodie J. Foster<sup>1</sup>, Peter K. Dearden<sup>2</sup>, Jonathan M. Waters<sup>1</sup>

5

6    1.     Department of Zoology, University of Otago, Dunedin 9016, New Zealand

7    2.     Department of Biochemistry, University of Otago, Dunedin 9016, New

8    Zealand

9

10   Genotyping by Sequencing (GBS); Single Nucleotide Polymorphism (SNP); insect;

11   flight loss; phenotype evolution; wing loss

12

13   Corresponding author: Andrew Veale

14   Address: Department of Zoology, University of Otago, Dunedin 9016, New Zealand.

15   Email: [andrew.veale@otago.ac.nz](mailto:andrew.veale@otago.ac.nz)

16   Fax: +64-3-4797584

17

18   **Running title:** Testing for SNPs linked to insect wing reduction

19

20

21

22

23

24 **Abstract**

25

26 Wing polymorphism is a prominent feature of numerous insect groups, but the  
27 genomic basis for this diversity remains poorly understood. Wing reduction is a  
28 commonly observed trait in many species of stoneflies, particularly in cold or alpine  
29 environments. The widespread New Zealand stonefly *Zelandoperla fenestrata*  
30 species group (*Z. fenestrata*, *Z. tillyardi*, *Z. pennulata*) contains populations ranging  
31 from long-winged (macropterous) to vestigial-winged (micropterous), with the latter  
32 phenotype typically associated with high altitudes. The presence of flightless forms  
33 on numerous mountain ranges, separated by lowland fully winged populations,  
34 suggests wing reduction has occurred multiple times. We use Genotyping by  
35 Sequencing (GBS) to test for genetic differentiation between fully winged (n=62) and  
36 vestigial-winged (n=34) individuals, sampled from a sympatric population of distinct  
37 wing morphotypes, to test for a genetic basis for wing morphology. We found no  
38 population genetic differentiation between these two morphotypes across 6,843 SNP  
39 loci, however we did detect several outlier loci that strongly differentiated  
40 morphotypes across independent tests. This indicates small regions of the genome are  
41 likely to be highly differentiated between morphotypes, indicating a genetic basis for  
42 morphotype differentiation. These results provide a clear basis for ongoing genomic  
43 analysis to elucidate critical regulatory pathways for wing development in Pterygota.

44

45

46 **Introduction**

47

48 Understanding the genetic basis of phenotypic variability not only illuminates the  
49 active evolutionary processes occurring within species but may also shed light on the  
50 evolution of different morphologies among species. Wing polymorphism has arisen  
51 in many insect orders, with variability in wing morphology prominent in Hemiptera  
52 (true bugs), Coleoptera (beetles), Orthoptera (crickets and grasshoppers), and  
53 Plecoptera (stoneflies) <sup>1-4</sup>. Within these groups, species that have lost flight are  
54 particularly common on islands, at high altitudes and high latitudes <sup>1</sup>. The degree of  
55 wing development may vary between closely related species or within a species.  
56 While referred to as “wing polymorphism”, this variation often consists of morphs  
57 that differ in all major aspects of flight capability (e.g. size of flight muscles,  
58 production of flight fuels), as well as many other aspects of physiology and  
59 reproduction. These polymorphisms may result from a variety of causes: alternate  
60 morphologies may be encoded by different genotypes (genetic polymorphism),  
61 induced by different environments (environmental polyphenism), or produced by  
62 variation in both genetic and environmental factors <sup>5</sup>. The degree of wing  
63 development can either be dimorphic with two alternative forms, or variation can  
64 exist along a spectrum.

65

66 There are many factors that influence the relative costs and benefits of flight in insects  
67 (reviewed by <sup>2,6-8</sup>). Wing reduction may confer an adaptive advantage when habitat  
68 stability is high, and when habitat complexity is low <sup>9</sup>. Habitat isolation may also  
69 promote flight loss, as the removal of flighted emigrants from habitat patches selects  
70 against this dispersal ability <sup>7,10-12</sup> <sup>1</sup>. Specifically, in alpine environments high winds  
71 may sweep away individuals with long wings <sup>7,13-15</sup>. Wing reduction has also been  
72 attributed to the high energy expenditure required in the production and maintenance

73 of flight apparatus, which are traded off at the expense of other life-history traits –  
74 particularly fecundity<sup>1,4,16-21</sup>.

75

76 Stoneflies are of particular interest relating to the evolution of insect flight because of  
77 their early divergence within winged insects (Pterygota) and since they exhibit  
78 multiple wing-powered locomotive behaviors, including sailing and skimming on the  
79 water surface<sup>22</sup>. These methods of locomotion have even been proposed as models  
80 for the evolution of flight in insects<sup>23-25</sup>, and it has been suggested that stoneflies thus  
81 may exhibit an ancestral form of wing and flight development<sup>22,26</sup>. Many stonefly  
82 species have reduced wings, with four forms of wing-length polymorphism described:  
83 macropterism (fully winged or long-winged), brachypterism (short-winged),  
84 micropterism (vestigial-winged) and apterism (wingless)<sup>27</sup>. Even fully winged  
85 stonefly taxa are typically considered to be weak flyers with limited dispersal ability  
86<sup>27-33</sup>. There have been several studies of wing reduction in stoneflies e.g.<sup>13,15,32,34-38</sup>,  
87 with some suggesting a possible genetic basis for short wingedness e.g.<sup>39</sup> but this  
88 hypothesis remains to be tested.

89

90 Over the last decade, high-throughput genetic sequencing, along with reduced  
91 representation genomic libraries<sup>40</sup> have enabled the low-cost discovery and  
92 genotyping of thousands of genetic markers for non-model organisms, revolutionizing  
93 ecological, evolutionary and conservation genetics<sup>41-43</sup>. In particular, these advances  
94 have enabled the discovery of many candidate loci involved in specific phenotypic  
95 traits<sup>44-46</sup>. Such advances have been made either with quantitative trait loci (QTL)  
96 mapping using pedigree information, or through genome-wide association studies  
97 (GWAS) that identify non-random associations of alleles between loci and adaptive

98 traits as a consequence of natural selection <sup>47-49</sup>.

99

100 The underlying bases for wing polymorphism have now been studied in several  
101 species of insects, showing various environmental, developmental, and genetic  
102 controls, often with multiple developmental pathways and regulators e.g. <sup>50</sup>. For  
103 instance, the proximate endocrine processes that control wing development have been  
104 investigated in wing-polymorphic crickets (*Gryllus sp.*), showing Juvenile Hormone  
105 (JH) may regulate wing development in this species <sup>5,51</sup>, while in a planthopper  
106 (*Nilaparvata lugens*), genes in the insulin-signaling pathway may regulate wing  
107 development <sup>52,53</sup>. The genes responsible for wing polymorphism have also recently  
108 been investigated in ants (*Pheidole morrisi*) <sup>54</sup>, salt marsh beetles (*Pogonus chalceus*)  
109 <sup>55</sup>, and pea aphids (*Acyrtosiphon pisum*) <sup>56,57</sup>. There are also known genes  
110 responsible for wing patterning and development in model organisms such as  
111 *Drosophila melanogaster*, which may be relevant to intra-specific wing  
112 polymorphism <sup>58</sup>. While genetic changes often underlie wing polymorphism,  
113 epigenetic changes have also been demonstrated between wing morphs in a  
114 planthopper (*Sogatella furcifera*) <sup>59,60</sup>.

115

116 The New Zealand stonefly *Zelandoperla fenestrata* species group (*Z. fenestrata*, *Z.*  
117 *pennulata*, *Z. tillyardi*) contains populations that range from fully winged to vestigial-  
118 winged, with wing-reduced populations more prevalent in southern South Island,  
119 particularly at higher altitudes <sup>61,62</sup>. Under current taxonomy micropterous individuals  
120 are classified as *Zelandoperla pennulata* (McLellan 1967), dark-colored individuals  
121 including those implicated in the mimicry of another stonefly (*Austroperla cyrene*)  
122 are classified as *Zelandoperla tillyardi* (McLellan 1999), while the remaining light-

123 colored fully winged individuals are classified as *Zelandoperla fenestrata* (Tillyard  
124 1923). The three described species, however, appear to represent co-distributed color  
125 and wing-length polymorphisms rather than discrete evolutionary units, with the  
126 species group actually comprising five geographically discrete, deeply divergent  
127 clades (from 2% - 9% average divergence at COI)<sup>32</sup>. These five regional clades  
128 exhibit differing propensities to exhibit wing reduced populations. Of the five clades  
129 of *Z. fenestrata* species group, Clade 1 is generally wing-dimorphic, with fully  
130 winged lowland populations and alpine associated vestigial-winged populations, with  
131 a steep transition in wing morphology at around 500 m.a.s.l (Figure 1). In contrast,  
132 Clades 2-4 appear to be comprised of only fully winged individuals, and Clade 5 is  
133 thought to be exclusively micropterous or apterous<sup>62</sup>. Given the level of divergence  
134 between clades, and the probable differences in developmental characteristics  
135 between them, these clades may represent different species; further study is warranted  
136 to reclassify this group. The believed difference in propensity for wing reduction in  
137 different clades may suggest the possibility of a genetic basis for wing reduction in  
138 these taxa. Furthermore, the presence of non-dispersive, flightless forms on multiple  
139 mountain ranges in *Z. fenestrata* Clade 1, separated by lowland winged populations,  
140 suggests wing reduction may have evolved multiple times in this lineage<sup>32</sup>. At finer  
141 spatial scales, recent genetic studies have shown phylogenetic divergence in wing-  
142 reduced populations of *Z. fenestrata* Clade 1 between adjacent mountain streams,  
143 highlighting the low dispersal ability of alpine populations and the possibility that  
144 each stream may have been colonized independently by winged lowland ancestors<sup>63</sup>.  
145 The specific mechanisms and genes behind wing development and polymorphism in  
146 *Z. fenestrata* remain unknown.

147

148 There are two (non-exclusive) hypotheses as to how *Z. fenestrata* Clade 1 lose their  
149 wings: 1) wing loss is genetically determined, or 2) wing loss is mediated by  
150 environmentally determined gene expression (i.e. polyphenism). Both of these  
151 hypotheses have received support from studies of other wing-dimorphic insects.  
152 Examples of taxa showing genetically determined wing dimorphism (Hypothesis 1)  
153 include several species of carabids and weevils<sup>14,64,65</sup> where wing dimorphism is  
154 controlled by a single gene operating in a Mendelian fashion. Similarly, in field  
155 crickets<sup>66</sup> and maize leaf hoppers (*Cicadulina sp.*)<sup>67</sup>, wing polymorphism is  
156 genetically controlled but related to a complex interplay between many genes.  
157 However, in a situation more consistent with Hypothesis 2 (polyphenism), while wing  
158 morphology in *Gryllus* crickets can be controlled either by a single gene locus or a  
159 polygene complex, both can be regulated by the level of juvenile hormone (JH) –  
160 whereby if JH exceeds a threshold value during a critical developmental stage of the  
161 insect, wing development is suppressed<sup>5,51,68</sup>. Other environmental factors that can  
162 influence wing development include abiotic factors such as temperature<sup>65</sup> and  
163 photoperiod<sup>69</sup> as well as biotic factors such as food resources<sup>65</sup> and population  
164 density<sup>70</sup>. Many of these environmental regulators of wing development also have a  
165 genetic component, for instance the fully winged morphotype of the red fire bug  
166 (*Pyrrhocoris apterus*) is determined by a recessive allele, whose penetrance depends  
167 on photoperiod and temperature<sup>71</sup>. Environmentally induced wing polyphenism in  
168 insects can also be transgenerational, with the level of the hormone ecdysone in the  
169 mother (regulated by population density) altering the expression of wing development  
170 in the offspring of the pea aphid (*Acyrtosiphon pisum*)<sup>72</sup>.

171

172 In this study, we use Genotyping By Sequencing (GBS) to test for genetic

173 differentiation between wing morphotypes in *Z. fenestrata* Clade 1, and test for loci  
174 specifically associated with wing reduction. GBS analyses a subset of the genome  
175 next to specific restriction sites, providing a near random sample of SNP loci across  
176 the genome, some of which may be associated with differentially adaptive genes or  
177 regulatory regions<sup>47-49</sup>. As mentioned, *Z. fenestrata* Clade 1 is a divergent clade of  
178 the species group, with a propensity for alpine related wing-reduction, and it may be  
179 divergent enough to other clades to warrant reclassification to species or sub-species  
180 level. Surveys of *Z. fenestrata* Clade 1 morphotype distributions conducted by our  
181 lab identified one stream (Black Jacks Creek) that exhibited an unusual pattern of  
182 high overlap between wing morphotype populations at a low altitude. By focusing  
183 our study on a single stream population that exhibits co-distributed extreme wing  
184 morphologies, we aim to examine genomic differentiation between morphotypes  
185 without the confounding factor of neutral genetic population structure or other  
186 environmental differences.  
187



## 188 **Methods**

### 189 **SAMPLE COLLECTION**

190 Sampling was conducted along Black Jacks Creek ( on the  
191 Old Man Range, South Island, New Zealand, at three sampling zones (80 – 100  
192 m.a.s.l; 120-140 m.a.s.l, 190-210 m.a.s.l) (Figure 1). Recently-emerged adults of *Z.*  
193 *fenestrata* Clade 1 were collected from under stones in rapids or in the moss or  
194 vegetation next to the stream and immediately stored in absolute ethanol. Large  
195 nymphs were also collected from under stones in rapids and returned to the laboratory  
196 in a cooler, where they were reared in Styrofoam cups at 11°C in water from their  
197 natal stream with small amounts of stream vegetation. Upon emerging as adults  
198 (within 30 days of sampling), individuals were immediately transferred to ethanol and  
199 stored at 4°C. While the exact location was not identified for each sample, the  
200 approximate altitude was recorded within 20 m altitude. Samples from within a  
201 locality were obtained from numerous different rocks across each sampling location.

202

### 203 **MORPHOLOGICAL CLASSIFICATION**

204

205 All 127 individuals collected were photographed using a stereo microscope, and  
206 forewing length and body length were measured from a stage micrometer scale in  
207 ImageJ<sup>73</sup>. Forewings and hindwings are equally sized for each individual, therefore  
208 measuring both was not necessary. We visually sorted specimens into either a fully  
209 winged (macropterous) or vestigial-winged (micropterous) groups. To examine the  
210 variation in wing length and body length we then visualized these data, and created a  
211 generalized linear model (GLM) for wing length based on body length, sex, sampling

212 altitude and our previous wing length classification in R. These analyses tested for a  
213 clear pattern of wing dimorphism in this population, and to ensure the morphology  
214 classification was not biased by any additional influencing factors (e.g. size, altitude  
215 or sex).

216

## 217 **DNA EXTRACTION AND SEQUENCING**

218

219 DNA extractions and GBS library prep were carried for 96 individuals (34 fully  
220 winged, 62 vestigial-winged) using the same methodology as Dussex, et al.<sup>63</sup>. DNA  
221 extractions were carried out using DNeasy kits (Qiagen, Valencia, CA, USA)  
222 according to the manufacturer's protocol using dissected head and femur tissue.  
223 Genotyping by sequencing library preparation followed the protocols of Elshire et al.  
224 (2011) with modifications as follows. DNA extractions were first dried using a  
225 vacuum centrifuge at 45°C, then resuspended in 15 µL dH<sub>2</sub>O. To each sample, a  
226 uniquely barcoded PstI adapter was added (2.25 ng per sample; Morris et al. 2011).  
227 DNA digestion was performed using 4UPstI-HF (NewEngland Biolabs, Ipswich, MA;  
228 Morris et al. 2011) in 1X CutSmart Buffer<sup>TM</sup>130 with incubation at 37°C for 2 h.  
229 Adapters were ligated with T4 DNA ligase in 1X ligation buffer (New England  
230 Biolabs), followed by incubation at 16°C for 90 min and 80°C for 30 min.  
231 Purification was performed using a Qiagen MinElute PCR purification kit, with  
232 elution in 25 mL 1X TE. PCRs were carried out in 50 mL volumes containing 10 mL  
233 purified DNA, 1X MyTaq<sup>TM</sup> HS Master Mix (Bioline), and 1 mM each of PCR  
234 primers

235 5\_AATGATACGGCGACCACCGAGATCTACACTCTTTCCCTACACGACGCTC

236 TTCCGATC\*T and 5\_

237 CAAGCAGAAGACGGCATACGAGATCGGTCTCGGCATTCCTGCTGAACCGC  
238 TCTTCCGATC\*T (where \* indicates phosphorothioation) as per Dussex et al.  
239 (2016). PCRs were run in a Mastercycler ep Gradient S (Eppendorf, Hamburg,  
240 Germany) under the following conditions: 72°C for 5 min, 95°C for 60 s, and 24  
241 cycles of 95°C for 30 s, 65°C for 30 s, and 72°C for 30s, with a final extension step at  
242 72°C for 5 min. Sample concentrations were assessed using a NanoDrop  
243 spectrophotometer (Thermo Scientific) and all samples were pooled (20 ng DNA per  
244 sample). Size fractionation of the pooled library was achieved via electrophoresis on a  
245 1.5% agarose gel, with a 300 bp size range from 200 to 500 bp selected for  
246 sequencing. A total of 96 samples were sequenced on one lane of an Illumina HiSeq  
247 2500.

248

## 249 ANALYSES

250

### 251 *Bioinformatic processing*

252

253 All reads were trimmed, filtered and analyzed using the STACKS pipeline <sup>74</sup> in order  
254 to create catalogues of comparable SNP loci. We optimized the pipeline according to  
255 the recommendations of Paris, et al. <sup>75</sup>. Initially, the PROCESS\_RADTAGS module  
256 was used to separate reads by their barcode, remove low-quality reads (any read with  
257 an average Phred score < 10 in any sliding window of 11bp), trim all reads to 70 base  
258 pairs in length, and remove any reads that did not contain the enzyme recognition  
259 sequence. Next, the USTACKS module was used for the *de novo* assembly of raw  
260 reads into RAD tags. The minimum number of reads to create a stack was set at 3 (-m  
261 parameter in USTACKS), and the maximum number of pairwise differences between

262 stacks was 2 (-M parameter in USTACKS). A catalogue of RAD tags was then  
263 generated using the 25 highest coverage individuals from each ecotype in CSTACKS.  
264 The distance allowed between catalogue loci (-n in CSTACKS) was increased to 2,  
265 after different trials were run to ensure loci were not inaccurately called as separate  
266 stacks. The execution of these components was accomplished using the STACKS  
267 `denovo_map.pl` script; in running this script, the optional -t flag was used to remove  
268 highly repetitive RAD tags during the USTACKS component of the pipeline.  
269 Following assembly and genotyping, the data were further filtered to maximize data  
270 quality. Using the POPULATIONS module, we retained only those loci that were  
271 genotyped in  $\geq 50\%$  of individuals and had a minor allele frequency  $\geq 0.05$  and a  
272 minimum stack depth of 10 (-m in POPULATIONS) for each individual. Genotypic  
273 data were exported from STACKS in GENEPOP format <sup>76</sup> and converted for  
274 subsequent analyses using PGD SPIDER v. 2 <sup>77</sup>.

275

### 276 *Population Structure*

277 We investigated the number of populations (or clusters) represented in our data using  
278 FASTSTRUCTURE <sup>78</sup> and the putatively neutral SNP dataset, default parameters, a  
279 logistic prior, and  $K$  from 1 to 6. The appropriate number of model components that  
280 explained structure in the dataset was determined using the *chooseK.py* function <sup>78</sup>.  
281 Results for the identified optimal values of  $K$  were visualized using DISTRUCT <sup>79</sup>.  
282 We also estimated the number of clusters using the *find.clusters* command in  
283 ADEGENET, with optimization based on the Bayesian Information Criterion (BIC).  
284 Finally, we created a Euclidian distance matrix between individuals in the R package  
285 ADEGENET <sup>80</sup>, which we then displayed using a neighbor-joining tree produced in  
286 the R package APE <sup>81</sup>.

287

288 *Outlier loci detection and annotation*

289 Due to the limitations of differentiation-based methods and the potentially high false  
290 positive rates when looking for outlier loci under divergent selection<sup>82,83</sup>, we utilized  
291 two distinct approaches: 1) an  $F_{ST}$  based outlier approach between *a priori*  
292 morphotype-pairs implemented in BAYESCAN<sup>84</sup>; and 2) a hierarchical Bayesian  
293 modeling approach implemented in PCADAPT<sup>85</sup>.

294

295 BAYESCAN analyses can give spurious results when there is significant over-  
296 representation of one of the groups being compared<sup>86</sup>. Due to the sample size of  
297 vestigial-winged specimens being approximately twice the number of fully winged  
298 specimens, we performed two independent BAYESCAN runs, both including all fully  
299 winged individuals, but each with a different half of the vestigial-winged group.  
300 These two comparisons therefore each had a balanced design, and can be used to  
301 evaluate the generality of outlier loci detected across partially independent  
302 comparisons (given that one comparison group remains the same while the other  
303 changes). For each analysis, BAYESCAN was run using 10,000 output iterations, a  
304 thinning interval of 10, 20 pilot runs of length 10,000, and a burn-in period of 10,000,  
305 with prior odds of the neutral model of 10. We recorded all loci with a q-value of 0.2  
306 or less, which equates to a false discovery rate of 20%. Q-values are far more  
307 stringent than p-values in classical statistics as they are adjusted for the false  
308 discovery rate given multiple comparisons, rather than the individual false positive  
309 rates in each comparison<sup>87</sup>. To better understand the rates of false positive  
310 identification for outlier loci in this dataset, we also undertook 20 runs of

311 BAYESCAN using identical parameters but comparing randomized groups of  
312 individuals (each also consisting of 34 individuals).

313

314 We also conducted outlier detection as implemented in PCADAPT<sup>85</sup>. The number of  
315 Principal Components retained ( $K$ ) for each analysis was determined by the graphical  
316 approach based on the scree-plot<sup>88</sup>, as recommended by Luu, et al.<sup>85</sup>.

317

318

## 319 **Results**

### 320 *Morphology*

321 Of 127 adults measured in this *Z. fenestrata* Clade 1 population, we found clear wing  
322 dimorphism for both males and females, with an approximately even number of each  
323 sex sampled (Figure 2). Fully winged individuals had an average forewing length:  
324 body length ratio of  $1.06 \pm 0.15$ , while the vestigial-winged individuals had an  
325 average forewing length: body length ratio of  $0.26 \pm 0.28$ , and there was no overlap in  
326 the distribution of wing lengths between groups. This difference in wing length was  
327 highly significant ( $t = -57.479$ ,  $p < 2e-16$ ). Sampling altitude (over this small  
328 altitudinal range) had no significant effect on the proportion of each morphotype, nor  
329 did it affect body length or wing length. Sex was significantly correlated with  
330 forewing length ( $t = -3.331$ ,  $p = 0.00114$ ), with females consistently having both  
331 longer forewings and bodies than males for both the fully winged and vestigial-  
332 winged forms, and there was also a significant positive correlation between body  
333 length and wing length within each sex ( $t = 2.811$ ,  $p = 0.00575$ ).

334

335 *GBS genotypic data and alignment*

336

337 Following GBS, processing and filtering, we collected genotypic data at 6,843 SNPs  
338 across 96 of the measured 127 *Z. fenestrata* Clade 1 individuals – leaving out  
339 randomly selected vestigial-winged individuals as this dataset was far larger than the  
340 fully winged dataset. The sequences of these tags containing these SNPS are  
341 provided in Supplementary Table 1.

342

343 We found no detectable population structure across the samples using any of the  
344 analyses. FASTSTRUCTURE indicated an optimal number of clusters as 1, and  
345 when the higher number of clusters were investigated no clear pattern of  
346 differentiation emerged (Supplementary table 1). Similarly, using the *find.clusters*  
347 function in ADEGENET, the optimal number of clusters was 1, and no trend in  
348 differential clustering was visible for higher values of K. Finally, no genetic structure  
349 was evident in the neighbor-joining tree (Figure 3) or principal component analyses  
350 (Figure 4).

351 Given these results we conclude that there is no neutral population structure between  
352 fully winged and vestigial-winged individuals when sampled from the same location,  
353 and no differentiation among sampling localities. Given this apparent panmixia,  
354 genetic differences associated with morphotype differentiation, if present, must  
355 therefore be limited to small regions of the genome, likely indicating loci under  
356 divergent selection.

357

358 *Outlier loci detection and comparison*

359

360 Given that no principal components correlated to morphotype differentiation,  
361 PCADAPT was unable to detect outliers associated with morphotypes, instead only  
362 identifying loci associated with the differentiation of a handful of slightly divergent  
363 individuals (Figure 4).

364

365 Because we had 34 fully winged individuals compared with 62 vestigial-winged  
366 individuals, we conducted two separate BAYESCAN analyses, dividing the vestigial-  
367 winged population sample in two. This was done because having highly uneven  
368 sample sizes in the two groups can disproportionately skew results<sup>86</sup>. This approach  
369 also gave us the opportunity to compare the results of these two analyses, identifying  
370 loci that were found to be significant in these largely independent comparisons.

371

372 The two BAYESCAN runs detected 17 and 14 outlier loci with a q-value of <0.2  
373 (Supplementary Table 2). Of these, three loci were identified in both comparisons,  
374 with one locus (14459\_12) identified as the most significantly differentiated SNP in  
375 both comparisons, with q-values of (0.00570 and <0.00000). In independent  
376 comparisons with random differences between groups with loci differentiation  
377 distributions to those observed, one would expect 0.03 loci to be detected as outliers  
378 in both comparisons, and the probability that the most differentiated locus would be  
379 identical would be <0.0001.

380 In the randomized BAYESCAN runs, an average of 10.6 outlier loci were detected at  
381 a q-value of 0.2, with a maximum of 13 outlier loci detected. This number of outliers  
382 recorded is slightly lower than the real winged vs. wingless comparisons, however not  
383 greatly, indicating that at this relatively relaxed reporting value for q-values many of  
384 the recorded outliers are likely to be false positives. However, the minimum q-value



385 recorded across these random comparisons was 0.026. In both of our real  
386 comparisons between winged and wingless groups, three outliers were more  
387 significant than this, including the outliers identified in multiple comparisons which  
388 were considerably lower. This provides strong evidence that these very high  
389 confidence outliers are truly associated with the difference in phenotype and not  
390 statistical false positives.

391

392 The observed differentiation between fully winged and vestigial-winged individuals at  
393 these outlier loci strongly suggests that there are regions of the genome highly  
394 differentiated between these two morphotypes. Due to the paucity of genomic data  
395 published for Plecoptera, we were unable to map these outlier loci via BLAST-n to  
396 genomic regions to identify the genes present in the surrounding regions.

## 397 **Discussion**

398 In this study, we tested for a genetic basis for wing reduction in the New Zealand  
399 stonefly *Z. fenestrata* Clade 1. While we found no neutral population structure among  
400 the two sympatric morphotypes we detected outlier loci between fully winged and  
401 vestigial-winged *Z. fenestrata* Clade 1 individuals, with several of the most highly  
402 differentiated outlier loci common to distinct sample comparisons. These results  
403 match the predictions of a ‘divergence with gene flow’ scenario, where small regions  
404 of the genome (genomic islands of divergence) are highly differentiated, contrasting  
405 with lower differentiation across the rest of the genome<sup>89-91</sup>. These results strongly  
406 support the hypothesis that wing reduction in *Z. fenestrata* Clade 1 is at least partially  
407 genetically determined, and not solely an environmentally determined polyphenism.

408 Given a probable genetic basis for wing morphotype, and evidence for divergent  
409 selection for different morphotypes at different altitudes as indicated by the broader  
410 altitudinal distribution of the two morphotypes<sup>32,63</sup>, this system is potentially an  
411 example of early ecological divergence with gene flow, similar to recent examples of  
412 ecological speciation e.g.<sup>92,93</sup>. While reproductive barriers do not apparently exist  
413 between these two sympatric morphotypes in Clade 1, the broad system we describe  
414 demonstrates the effects of divergent selection at different altitudes, with ongoing  
415 gene flow where the two forms meet.

416

417 When populations occupy different habitats, divergent natural selection can cause  
418 differentiation in ecologically important characters (for review, see Schluter<sup>94</sup>), and  
419 conversely, gene flow between divergent populations acts as a homogenizing force,  
420 eroding population differentiation<sup>95</sup>. In the majority of *Z. fenestrata* Clade 1  
421 populations, vestigial-winged populations occupy higher altitudes and are largely  
422 allopatric to the lower altitude fully winged populations. It appears that gene flow  
423 over any distance is extremely low for *Z. fenestrata*, as evidenced by the fine-scale  
424 genetic structure between nearby streams<sup>63</sup>. This poor flighted dispersal ability may  
425 contribute towards maintaining the divergence between morphotype populations,  
426 despite the observed homogenization across the majority of the genome in geographic  
427 regions of population overlap. Indeed, the micropterous phenotype is likely to  
428 decrease gene flow due to the lack of any flighted long-distance dispersal. In most  
429 systems where ecological divergence is detected there is considerable reproductive  
430 isolation between morphotypes; the low dispersal abilities of *Z. fenestrata* may be the  
431 mechanism that helps maintain this isolation in most streams.

432 One question that remains to be addressed is why the Black Jacks Creek *Z. fenestrata*  
433 Clade 1 population exhibits the high degree of overlap between morphotypes,  
434 particularly relating to high proportion of vestigial-winged individuals present at low  
435 altitudes. Previous studies have indicated a sharp transition from fully winged to  
436 vestigial-winged or apterous at around 500 m.a.s.l.<sup>32</sup>. We offer two hypotheses as to  
437 why sympatry occurs at this altitude at Black Jacks Creek, though these must be  
438 regarded as speculation until further testing is done. Firstly, a disturbance such as a  
439 large storm may have flushed out a large proportion of the fully winged individuals  
440 into the nearby Clutha River, replacing them with vestigial-winged individuals from  
441 higher altitudes. Alternatively, the selection pressure for wing reduction occurs at a  
442 lower altitude in this stream – or relates to very fine-scale microhabitat surrounding  
443 Black Jacks Creek, which is a patchy mosaic of scrub and grassland modified by  
444 recent farming activities.

445

446 Our results reinforce the need for taxonomic revision for this species group, as there is  
447 no genetic evidence for the separation of vestigial-winged morphotypes into the  
448 separate taxon *Z. pennulata*. Along with there being no neutral genetic differentiation  
449 between co-occurring morphotypes of this species, we found no temporal or spatial  
450 segregation of the two morphotypes, given that recently-emerged fully winged and  
451 vestigial-winged individuals were collected simultaneously. These results are  
452 consistent with the completely overlapping temporal patterns of emergence  
453 documented by McLellan<sup>62</sup>.

454

455 While we infer that there is evidence for a genetic component to the differentiation of  
456 wing morphotypes, there may also be an environmental component to this

457 differentiation. In other species of insects, the penetrance of genetic factors  
458 regulating wing development can be mediated by environmental factors, and therefore  
459 the expression of phenotype can be highly complex<sup>71,72</sup>. The differing patterns of  
460 wing loss in the different clades of *Z. fenestrata* Clade 1 may indicate the interactive  
461 roles played between the environment and genetics. It remains possible that some  
462 level of environmentally determined gene expression is partially responsible for the  
463 observed wing morphotypes found across the *Z. fenestrata* species group.

464 While we analysed SNP data, we do not infer that SNPs underlie the phenotypic  
465 differences observed, nor that the outlier SNPs identified in our study have any causal  
466 relationship to the observed developmental differences between morphotypes. Rather,  
467 these SNPs are likely to be in linkage with changes in nearby regions of the genome  
468 that influence morphotype<sup>96</sup>. As regions linked to the genetic changes underlying  
469 phenotypic differences can be very large (e.g.<sup>97,98</sup> we would require a well annotated  
470 and near complete genomic sequence before we could speculate as to the specific  
471 changes responsible for wing polymorphism.

472

473 Untangling the precise mechanisms behind wing reduction in the *Z. fenestrata* species  
474 group, including testing for an environmentally induced component to these  
475 alternative developmental pathways will require further experimentation. While the  
476 *Z. fenestrata* species group is a fascinating system to study the mechanisms wing  
477 reduction in insects, the group does have some life-history and population  
478 characteristics that create challenges for understanding the mechanism(s) behind wing  
479 loss difficult. *Z. fenestrata* can have a long generation time (perhaps involving years  
480 as a wingless nymph), making breeding experiments and QTL studies challenging.

481 Furthermore, their habitat is fast flowing rapids in highly oxygenated streams with  
482 cold water, making them difficult to raise in laboratory settings for a full life cycle,  
483 and hindering reciprocal translocation experiments in the wild. Combining long-term  
484 common garden experiments and analyses of gene expression should provide more  
485 information to the regulatory mechanisms and pathways for wing development in this  
486 species.

487

488 Currently the genomic resources for *Z. fenestrata* (and all Plecoptera) are too  
489 incomplete to determine if the outlier loci identified are adjacent to each other, or  
490 more generally, if they are in islands of divergence. Without these genomic  
491 resources, it is also impossible to speculate as to the potential underlying genes that  
492 may be responsible for these two phenotypes. With further work creating a genome  
493 assembly for this species we will be able to look at the specific genomic regions  
494 linked to the outlier SNPs defined in this study.

495

## 496 **Conclusion**

497 Wing dimorphism is a common trait across many species of stoneflies, but the  
498 mechanisms behind this have yet to be investigated. *Z. fenestrata* Clade 1 presents an  
499 ideal taxon to examine this, potentially revealing the generalized mechanisms behind  
500 wing reduction in this order. Our results for this spatially overlapping population of  
501 fully winged and vestigial-winged *Z. fenestrata* Clade 1 morphotypes supports the  
502 hypothesis that wing development has a genetic mechanism rather than being solely  
503 environmentally determined. While there was no neutral genetic structure between  
504 wing morphotypes, outlier loci were identified between these two groups. While it is

505 possible that these outlier loci are not themselves linked with the specific causative  
506 changes associated with wing development, any genetic differences linked to wing  
507 morphotype differentiation in an otherwise sympatric population must indicate that  
508 there is some genetic differentiation between morphotypes. Further examination of  
509 these outlier loci may reveal the underlying genes linked to wing reduction in this  
510 species.

511

## 512 **References**

513

- 514 1 Harrison, R. G. DISPERSAL POLYMORPHISMS IN INSECTS. *Annual*  
515 *Review of Ecology and Systematics* **11**, 95-118,  
516 doi:10.1146/annurev.es.11.110180.000523 (1980).
- 517 2 Roff, D. A. THE EVOLUTION OF WING DIMORPHISM IN INSECTS.  
518 *Evolution* **40**, 1009-1020, doi:10.2307/2408759 (1986).
- 519 3 Masaki, S. & Shimizu, T. VARIABILITY IN WING FORM OF CRICKETS.  
520 *Researches on Population Ecology* **37**, 119-128, doi:10.1007/bf02515769  
521 (1995).
- 522 4 Zera, A. J. & Denno, R. F. Physiology and ecology of dispersal polymorphism  
523 in insects. *Annual Review of Entomology* **42**, 207-230,  
524 doi:10.1146/annurev.ento.42.1.207 (1997).
- 525 5 Zera, A. J. The endocrine regulation of wing polymorphism in insects: State of  
526 the art, recent surprises, and future directions. *Integrative and Comparative*  
527 *Biology* **43**, 607-616, doi:10.1093/icb/43.5.607 (2003).
- 528 6 Roff, D. A. THE EVOLUTION OF FLIGHTLESSNESS - IS HISTORY  
529 IMPORTANT. *Evolutionary Ecology* **8**, 639-657, doi:10.1007/bf01237847  
530 (1994).
- 531 7 Roff, D. A. THE EVOLUTION OF FLIGHTLESSNESS IN INSECTS.  
532 *Ecological Monographs* **60**, 389-421, doi:10.2307/1943013 (1990).
- 533 8 Roff, D. A. & Fairbairn, D. J. WING DIMORPHISMS AND THE  
534 EVOLUTION OF MIGRATORY POLYMORPHISMS AMONG THE  
535 INSECTA. *American Zoologist* **31**, 243-251 (1991).
- 536 9 Roff, D. A. HABITAT PERSISTENCE AND THE EVOLUTION OF WING  
537 DIMORPHISM IN INSECTS. *American Naturalist* **144**, 772-798,  
538 doi:10.1086/285706 (1994).
- 539 10 Wagner, D. L. & Liebherr, J. K. FLIGHTLESSNESS IN INSECTS. *Trends*  
540 *Ecol. Evol.* **7**, 216-220, doi:10.1016/0169-5347(92)90047-f (1992).
- 541 11 Denno, R. F., Hawthorne, D. J., Thorne, B. L. & Gratton, C. Reduced flight  
542 capability in British Virgin Island populations of a wing-dimorphic insect: the  
543 role of habitat isolation, persistence, and structure. *Ecological Entomology* **26**,  
544 25-36, doi:10.1046/j.1365-2311.2001.00293.x (2001).

- 545 12 Den Boer, P. J. On the significance of dispersal power for populations of  
546 carabid-beetles (Coleoptera, Carabidae). *Oecologia* **4**, 1-28,  
547 doi:10.1007/bf00390612 (1970).
- 548 13 Brinck, P. Studies on Swedish stoneflies. *Opuscula Entomologica* **11**, 1 -  
549 250 (1949).
- 550 14 Jackson, D. J. The inheritance of long and short wings in the weevil, *Sitonia*  
551 *hispidula*, with a discussion of wing reduction among beetles. *Transactions of*  
552 *the Royal Society of Edinburgh* **55**, 655-735 (1928).
- 553 15 Hynes, H. B. N. The taxonomy and ecology of the nymphs of British  
554 Plecoptera with notes on the adults and eggs. *Trans Roy Ent Soc London* **91**,  
555 459-557 (1941).
- 556 16 Roff, D. A. THE COST OF BEING ABLE TO FLY - A STUDY OF WING  
557 POLYMORPHISM IN 2 SPECIES OF CRICKETS. *Oecologia* **63**, 30-37,  
558 doi:10.1007/bf00379781 (1984).
- 559 17 Zera, A. J. DIFFERENCES IN SURVIVORSHIP, DEVELOPMENT RATE  
560 AND FERTILITY BETWEEN THE LONGWINGED AND WINGLESS  
561 MORPHS OF THE WATERSTRIDER, *LIMNOPORUS-*  
562 *CANALICULATUS*. *Evolution* **38**, 1023-1032, doi:10.2307/2408436 (1984).
- 563 18 Roff, D. A. & Bradford, M. J. Quantitative genetics of the trade-off between  
564 fecundity and wing dimorphism in the cricket *Allonemobius socius*. *Heredity*  
565 **76**, 178-185, doi:10.1038/hdy.1996.25 (1996).
- 566 19 Roff, D. A., Tucker, J., Stirling, G. & Fairbairn, D. J. The evolution of  
567 threshold traits: effects of selection on fecundity and correlated response in  
568 wing dimorphism in the sand cricket. *Journal of Evolutionary Biology* **12**,  
569 535-546 (1999).
- 570 20 Ikeda, H., Kagaya, T., Kubota, K. & Abe, T. Evolutionary relationships  
571 among food habit, loss of flight, and reproductive traits: Life-history evolution  
572 in the Silphinae (Coleoptera : Silphidae). *Evolution* **62**, 2065-2079,  
573 doi:10.1111/j.1558-5646.2008.00432.x (2008).
- 574 21 Langellotto, G. A., Denno, R. F. & Ott, J. R. A trade-off between flight  
575 capability and reproduction in males of a wing-dimorphic insect. *Ecology* **81**,  
576 865-875, doi:10.1890/0012-9658(2000)081[0865:atobfc]2.0.co;2 (2000).
- 577 22 Thomas, M. A., Walsh, K. A., Wolf, M. R., McPheron, B. A. & Marden, J. H.  
578 Molecular phylogenetic analysis of evolutionary trends in stonefly wing  
579 structure and locomotor behavior. *Proceedings of the National Academy of*  
580 *Sciences of the United States of America* **97**, 13178-13183,  
581 doi:10.1073/pnas.230296997 (2000).
- 582 23 Marden, J. H. & Kramer, M. G. SURFACE-SKIMMING STONEFLIES - A  
583 POSSIBLE INTERMEDIATE STAGE IN INSECT FLIGHT EVOLUTION.  
584 *Science* **266**, 427-430, doi:10.1126/science.266.5184.427 (1994).
- 585 24 Thomas, A. L. R. & Norberg, R. A. Skimming the surface - The origin of  
586 flight in insects? *Trends Ecol. Evol.* **11**, 187-188, doi:10.1016/0169-  
587 5347(96)30022-0 (1996).
- 588 25 Samways, M. J. Skimming and insect evolution. *Trends Ecol. Evol.* **11**, 471-  
589 471, doi:10.1016/0169-5347(96)81156-6 (1996).
- 590 26 Marden, J. H. & Thomas, M. A. Rowing locomotion by a stonefly that  
591 possesses the ancestral pterygote condition of co-occurring wings and  
592 abdominal gills. *Biol. J. Linnean Soc.* **79**, 341-349, doi:10.1046/j.1095-  
593 8312.2003.00192.x (2003).

- 594 27 Costello, M. J. Preliminary Observations on Wing-Length Polymorphism in  
595 Stoneflies (Plecoptera: Insecta). *The Irish Naturalists' Journal* **22**, 474-478  
596 (1988).
- 597 28 Brundin, L. INSECTS AND PROBLEM OF AUSTRAL DISJUNCTIVE  
598 DISTRIBUTION. *Annual Review of Entomology* **12**, 149-&,  
599 doi:10.1146/annurev.en.12.010167.001053 (1967).
- 600 29 Zwick, P. Phylogenetic system and zoogeography of the plecoptera. *Annual*  
601 *Review of Entomology* **45**, 709-746, doi:10.1146/annurev.ento.45.1.709  
602 (2000).
- 603 30 Schultheis, A. S., Weigt, L. A. & Hendricks, A. C. Gene flow, dispersal, and  
604 nested clade analysis among populations of the stonefly *Peltoperla tarteri* in  
605 the southern Appalachians. *Mol. Ecol.* **11**, 317-327, doi:10.1046/j.1365-  
606 294X.2002.01445.x (2002).
- 607 31 Fochetti, R. & de Figueroa, J. M. T. Global diversity of stoneflies (Plecoptera :  
608 Insecta) in freshwater. *Hydrobiologia* **595**, 365-377, doi:10.1007/s10750-007-  
609 9031-3 (2008).
- 610 32 McCulloch, G. A., Wallis, G. P. & Waters, J. M. Do insects lose flight before  
611 they lose their wings? Population genetic structure in subalpine stoneflies.  
612 *Mol. Ecol.* **18**, 4073-4087, doi:10.1111/j.1365-294X.2009.04337.x (2009).
- 613 33 McCulloch, G. A., Wallis, G. P. & Waters, J. M. A time-calibrated phylogeny  
614 of southern hemisphere stoneflies: Testing for Gondwanan origins. *Mol.*  
615 *Phylogenet. Evol.* **96**, 150-160, doi:10.1016/j.ympev.2015.10.028 (2016).
- 616 34 Lillehammer, A. NORWEGIAN STONE-FLIES PART 5 VARIATIONS IN  
617 MORPHOLOGICAL CHARACTERS COMPARED TO DIFFERENCES IN  
618 ECOLOGICAL FACTORS. *Norwegian Journal of Entomology* **23**, 161-172  
619 (1976).
- 620 35 Malmqvist, B. How does wing length relate to distribution patterns of  
621 stoneflies (Plecoptera) and mayflies (Ephemeroptera)? *Biol. Conserv.* **93**, 271-  
622 276, doi:10.1016/s0006-3207(99)00139-1 (2000).
- 623 36 Loskutova, O. A. & Zhiltzova, L. A. Wing and body size polymorphism in  
624 populations of the stonefly *Arcynopteryx dichroa* McL. (Plecoptera:  
625 Perlodidae) in the Ural Mountains, Russia. *Polar Research* **35**,  
626 doi:10.3402/polar.v35.26596 (2016).
- 627 37 Saltveit, S. J. & Brittain, J. E. Short-wingedness in the stonefly *Diura nanseni*  
628 (Kempny) (Plecoptera: Perlodidae). *Entomologica Scandinavica* **17**, 153-156  
629 (1986).
- 630 38 Westermann, F. WING POLYMORPHISM IN *CAPNIA-BIFRONS*  
631 (PLECOPTERA, CAPNIIDAE). *Aquatic Insects* **15**, 135-140,  
632 doi:10.1080/01650429309361510 (1993).
- 633 39 Donald, D. B. & Patriquin, D. E. THE WING LENGTH OF LENTIC  
634 CAPNIIDAE (PLECOPTERA) AND ITS RELATIONSHIP TO  
635 ELEVATION AND WISCONSIN GLACIATION. *Canadian Entomologist*  
636 **115**, 921-926 (1983).
- 637 40 Davey, J. W. *et al.* Genome-wide genetic marker discovery and genotyping  
638 using next-generation sequencing. *Nature Reviews Genetics* **12**, 499-510,  
639 doi:10.1038/nrg3012 (2011).
- 640 41 Narum, S. R., Buerkle, C. A., Davey, J. W., Miller, M. R. & Hohenlohe, P. A.  
641 Genotyping-by-sequencing in ecological and conservation genomics. *Mol.*  
642 *Ecol.* **22**, 2841-2847, doi:10.1111/mec.12350 (2013).



- 643 42 Ellegren, H. Genome sequencing and population genomics in non-model  
644 organisms. *Trends Ecol. Evol.* **29**, 51-63, doi:10.1016/j.tree.2013.09.008  
645 (2014).
- 646 43 Andrews, K. R., Good, J. M., Miller, M. R., Luikart, G. & Hohenlohe, P. A.  
647 Harnessing the power of RADseq for ecological and evolutionary genomics.  
648 *Nature Reviews Genetics* **17**, 81-92, doi:10.1038/nrg.2015.28 (2016).
- 649 44 Stinchcombe, J. R. & Hoekstra, H. E. Combining population genomics and  
650 quantitative genetics: finding the genes underlying ecologically important  
651 traits. *Heredity* **100**, 158-170, doi:10.1038/sj.hdy.6800937 (2008).
- 652 45 Stapley, J. *et al.* Adaptation genomics: the next generation. *Trends Ecol. Evol.*  
653 **25**, 705-712, doi:10.1016/j.tree.2010.09.002 (2010).
- 654 46 Pardo-Diaz, C., Salazar, C. & Jiggins, C. D. Towards the identification of the  
655 loci of adaptive evolution. *Methods in Ecology and Evolution* **6**, 445-464,  
656 doi:10.1111/2041-210x.12324 (2015).
- 657 47 Long, A. D. & Langley, C. H. The power of association studies to detect the  
658 contribution of candidate genetic loci to variation in complex traits. *Genome*  
659 *Research* **9**, 720-731 (1999).
- 660 48 Shimizu, K. K. & Purugganan, M. D. Evolutionary and ecological genomics  
661 of arabidopsis. *Plant Physiology* **138**, 578-584, doi:10.1104/pp.105.061655  
662 (2005).
- 663 49 Stranger, B. E., Stahl, E. A. & Raj, T. Progress and Promise of Genome-Wide  
664 Association Studies for Human Complex Trait Genetics. *Genetics* **187**, 367-  
665 383, doi:10.1534/genetics.110.120907 (2011).
- 666 50 Ogawa, K. & Miura, T. Two developmental switch points for the wing  
667 polymorphisms in the pea aphid *Acyrtosiphon pisum*. *Evodevo* **4**,  
668 doi:10.1186/2041-9139-4-30 (2013).
- 669 51 Zera, A. J. Endocrine analysis in evolutionary-developmental studies of insect  
670 polymorphism: hormone manipulation versus direct measurement of hormonal  
671 regulators. *Evolution & Development* **9**, 499-513 (2007).
- 672 52 Xu, H. J. *et al.* Two insulin receptors determine alternative wing morphs in  
673 planthoppers. *Nature* **519**, 464+, doi:10.1038/nature14286 (2015).
- 674 53 Lin, X. D., Yao, Y., Wang, B., Emlen, D. J. & Lavine, L. C. Ecological Trade-  
675 offs between Migration and Reproduction Are Mediated by the Nutrition-  
676 Sensitive Insulin-Signaling Pathway. *International Journal of Biological*  
677 *Sciences* **12**, 607-616, doi:10.7150/ijbs.14802 (2016).
- 678 54 Abouheif, E. & Wray, G. A. Evolution of the gene network underlying wing  
679 polyphenism in ants. *Science* **297**, 249-252, doi:10.1126/science.1071468  
680 (2002).
- 681 55 Van Belleghem, S. M., Roelofs, D., Van Houdt, J. & Hendrickx, F. De novo  
682 Transcriptome Assembly and SNP Discovery in the Wing Polymorphic Salt  
683 Marsh Beetle *Pogonus chalceus* (Coleoptera, Carabidae). *Plos One* **7**,  
684 doi:10.1371/journal.pone.0042605 (2012).
- 685 56 Brisson, J. A. Aphid wing dimorphisms: linking environmental and genetic  
686 control of trait variation. *Philosophical Transactions of the Royal Society B-*  
687 *Biological Sciences* **365**, 605-616, doi:10.1098/rstb.2009.0255 (2010).
- 688 57 Brisson, J. A., Ishikawa, A. & Miura, T. Wing development genes of the pea  
689 aphid and differential gene expression between winged and unwinged morphs.  
690 *Insect Molecular Biology* **19**, 63-73, doi:10.1111/j.1365-2583.2009.00935.x  
691 (2010).

- 692 58 Nijhout, H. F. Control mechanisms of polyphenic development in insects - In  
693 polyphenic development, environmental factors alter same aspects of  
694 development in an orderly and predictable way. *Bioscience* **49**, 181-192,  
695 doi:10.2307/1313508 (1999).
- 696 59 Zhou, X. S., Chen, J. L., Meizhang, Liang, S. K. & Wang, F. H. Differential  
697 DNA Methylation Between Two Wing Phenotypes Adults of *Sogatella*  
698 *furcifera*. *Genesis* **51**, 819-826, doi:10.1002/dvg.22722 (2013).
- 699 60 Liang, S. K. *et al.* CpG methylated ribosomal RNA genes in relation to wing  
700 polymorphism in the rice pest *Sogatella furcifera*. *Journal of Asia-Pacific*  
701 *Entomology* **18**, 471-475, doi:10.1016/j.aspen.2015.06.002 (2015).
- 702 61 McLellan, I. D. ALPINE AND SOUTHERN PLECOPTERA FROM NEW-  
703 ZEALAND, AND A NEW CLASSIFICATION OF GRIPOPTERYGIDAE.  
704 *N. Z. J. Zool.* **4**, 119-147 (1977).
- 705 62 McLellan, I. D. A revision of *Zelandoperla* Tillyard (Plecoptera :  
706 *Gripopterygidae* : *Zelandoperlinae*). *N. Z. J. Zool.* **26**, 199-219 (1999).
- 707 63 Dussex, N., Chuah, A. & Waters, J. M. Genome-wide SNPs reveal fine-scale  
708 differentiation among wingless alpine stonefly populations and introgression  
709 between winged and wingless forms. *Evolution* **70**, 38-47,  
710 doi:10.1111/evo.12826 (2016).
- 711 64 Lindroth, C. H. Inheritance and wing dimorphism in *Pterostichus anthracinus*.  
712 *Hereditas* **32**, 37-40 (1945).
- 713 65 Aukema, B. Wing-length determination in two wing-dimorphic *Calathus*  
714 species (Coleoptera: Carabidae). *Hereditas* **113**, 189-202 (1990).
- 715 66 Harrison, R. G. Flight polymorphism in the field cricket *Gryllus*  
716 *pennsylvanicus*. *Oecologia* **40**, 125-132 (1979).
- 717 67 Rose, D. J. W. Dispersal and quality in populations of *Cicadulina* species  
718 (*Cicadellidae*). *J. Anim. Ecol.* **41**, 589-609 (1972).
- 719 68 Zera, A. J. & Tiebel, K. Differences in juvenile hormone esterase activity  
720 between presumptive macropterous and brachypterous *Gryllus rubens*:  
721 implications for the hormonal control of wing polymorphism. *Journal of*  
722 *Insect Physiology* **35**, 7-17 (1989).
- 723 69 Kimura, T. & Masaki, S. Brachypterism and seasonal adaptation in *Orgyia*  
724 *thyellina* Butler (Lepidoptera, Lymantriidae). *Kontyu* **45**, 97-106 (1977).
- 725 70 Vellichiramal, N. N., Madayiputhiya, N. & Brisson, J. A. The genomewide  
726 transcriptional response underlying the pea aphid wing polyphenism. *Mol.*  
727 *Ecol.* **25**, 4146-4160, doi:10.1111/mec.13749 (2016).
- 728 71 Honek, A. FACTORS AND CONSEQUENCES OF A NONFUNCTIONAL  
729 ALARY POLYMORPHISM IN PYRRHOCORIS-APTERUS  
730 (HETEROPTERA, PYRRHOCORIDAE). *Researches on Population Ecology*  
731 **37**, 111-118, doi:10.1007/bf02515768 (1995).
- 732 72 Vellichiramala, N. N., Guptab, P., Hallc, T. A. & Brisson, J. A. Ecdysone  
733 signaling underlies the pea aphid transgenerational wing polyphenism.  
734 *Proceedings of the National Academy of Sciences of the United States of*  
735 *America* **114**, 1419-1423 (2017).
- 736 73 Schindelin, J., Arganda-Carreras, I. & Frise, E. Fiji: an open-source platform  
737 for biological-image analysis. *Nature Methods* **9**, 676-682 (2012).
- 738 74 Catchen, J., Hohenlohe, P. A., Bassham, S., Amores, A. & Cresko, W. A.  
739 Stacks: an analysis tool set for population genomics. *Mol. Ecol.* **22**, 3124-  
740 3140, doi:10.1111/mec.12354 (2013).

- 741 75 Paris, J. R., Stevens, J. R. & Catchen, J. Lost in parameter space: a road map  
742 for STACKS. *Methods in Ecology and Evolution*, doi:10.1111/2041-  
743 210X.12775 (2017).
- 744 76 Raymond, M. & Rousset, F. Genepop (Version 1.2) - Population-genetics  
745 software for exact tests and ecumenicism. *J. Hered.* **86** (1995).
- 746 77 Lischer, H. E. L. & Excoffier, L. PGDSpider: an automated data conversion  
747 tool for connecting population genetics and genomics programs.  
748 *Bioinformatics* **28**, 298-299 (2012).
- 749 78 Raj, A., Stephens, M. & Pritchard, J. K. fastSTRUCTURE: Variational  
750 Inference of Population Structure in Large SNP Data Sets. *Genetics* **197**, 573-  
751 U207, doi:10.1534/genetics.114.164350 (2014).
- 752 79 Rosenberg, N. A. DISTRUCT: a program for the graphical display of  
753 population structure. *Molecular Ecology Notes* **4**, 137-138,  
754 doi:10.1046/j.1471-8286.2003.00566.x (2004).
- 755 80 Jombart, T. adegenet: a R package for the multivariate analysis of genetic  
756 markers. *Bioinformatics* **24**, 1403-1405, doi:10.1093/bioinformatics/btn129  
757 (2008).
- 758 81 Paradis, E., Claude, J. & Strimmer, K. APE: Analyses of Phylogenetics and  
759 Evolution in R language. *Bioinformatics* **20**, 289-290,  
760 doi:10.1093/bioinformatics/btg412 (2004).
- 761 82 De Mita, S. *et al.* Detecting selection along environmental gradients: analysis  
762 of eight methods and their effectiveness for outbreeding and selfing  
763 populations. *Mol. Ecol.* **22**, 1383-1399 (2013).
- 764 83 Vilas, A., Perez-Figueroa, A. & Caballero, A. A simulation study on the  
765 performance of differentiation-based methods to detect selected loci using  
766 linked neutral markers. *Journal of Evolutionary Biology* **25**, 1364-1376  
767 (2012).
- 768 84 Foll, M. & Gaggiotti, O. A genome-scan method to identify selected loci  
769 appropriate for both dominant and codominant markers: a bayesian  
770 perspective. *Genetics* **180**, 977-993, doi:10.1534/genetics.108.092221 (2008).
- 771 85 Luu, K., Bazin, E. & Blum, M. G. pcadapt: an R package to perform genome  
772 scans for selection based on principal component analysis. *Molecular Ecology*  
773 *Resources* **17**, 67-77 (2017).
- 774 86 Helyar, S. J. *et al.* Application of SNPs for population genetics of nonmodel  
775 organisms: new opportunities and challenges. *Mol. Ecol. Resour.* **11**, 123-136,  
776 doi:10.1111/j.1755-0998.2010.02943.x (2011).
- 777 87 Storey, J. D. & Tibshirani, R. Statistical significance for genomewide studies.  
778 *Proceedings of the National Academy of Sciences of the United States of*  
779 *America* **100**, 9440-9445, doi:10.1073/pnas.1530509100 (2003).
- 780 88 Jackson, D. A. Stopping rules in principal components analysis : a comparison  
781 of heuristical and statistical approaches. *Ecology*, 2204-2214 (1993).
- 782 89 Lotterhos, K. E. & Whitlock, M. C. The relative power of genome scans to  
783 detect local adaptation depends on sampling design and statistical method.  
784 *Mol. Ecol.* **24**, 1031-1046, doi:10.1111/mec.13100 (2015).
- 785 90 Nosil, P., Funk, D. J. & Ortiz-Barrientos, D. Divergent selection and  
786 heterogeneous genomic divergence. *Mol. Ecol.* **18**, 375-402,  
787 doi:10.1111/j.1365-294X.2008.03946.x (2009).
- 788 91 Via, S. & West, J. The genetic mosaic suggests a new role for hitchhiking in  
789 ecological speciation. *Mol. Ecol.* **17**, 4334-4345, doi:10.1111/j.1365-  
790 294X.2008.03921.x (2008).

- 791 92 Schluter, D. & Conte, G. L. Genetics and ecological speciation. *Proceedings*  
792 *of the National Academy of Sciences of the United States of America* **106**,  
793 9955-9962, doi:10.1073/pnas.0901264106 (2009).  
794 93 Nosil, P. *Ecological Speciation*. (Oxford University Press, 2012).  
795 94 Schluter, D. *The Ecology of Adaptive Radiation*. (Oxford University Press,  
796 2000).  
797 95 Slatkin, M. Gene flow and the geographic structure of natural populations.  
798 *Science* **236**, 787-792 (1987).  
799 96 Visscher, P. M. *et al.* 10 Years of GWAS Discovery: Biology, Function, and  
800 Translation. *American Journal of Human Genetics* **101**, 5–22 (2017).  
801 97 Boitard, S., Boussaha, M., Capitan, A., Rocha, D. & Servin, B. Uncovering  
802 Adaptation from Sequence Data: Lessons from Genome Resequencing of Four  
803 Cattle Breeds. *Genetics* **203**, 433–+, doi:10.1534/genetics.115.181594 (2016).  
804 98 Schlamp, F. *et al.* Evaluating the performance of selection scans to detect  
805 selective sweeps in domestic dogs. *Mol. Ecol.* **25**, 342-356,  
806 doi:10.1111/mec.13485 (2016).  
807

## 808 **Acknowledgements**

809 We wish to thank Tania King for her assistance in the lab, and Maxim Nekrasov at the  
810 John Curtin School of Medicine for his assistance in library sequencing. Thanks to  
811 Graham McCulloch and Brian Patrick for their advice on the system. This work was  
812 funded by Marsden fund grant ( UOO1412).

813

814

815

816

817

818

819

820

821

822

## 823 **Figure Legends**

824 Figure 1 Map showing the sampling locations along Black Jacks Creek (A = 200

825 m.a.s.l, B = 130 m.a.s.l, C = 90 m.a.s.l). Inset below are examples of the two

826 morphotypes to scale. To the right are the regional patterns of fully winged and

827 vestigial-winged *Z. fenestrata* Clade 1 (data from McCulloch et al., 2009).

828 Figure 2 Variation in the relative wing length and body length of *Z. fenestrata* Clade 1

829 from Black Jacks Creek.

830 Figure 3 Neighbor-joining tree of *Z. fenestrata* Clade 1 samples showing the lack of

831 phylogenetic differentiation between wing morphotypes

832 Figure 4 Principal component analysis of *Z. fenestrata* Clade 1 genetic differentiation

833 in Black Jacks Creek.

834 Figure 5 Scatterplot comparing the q-values obtained from the two independent

835 BAYESCAN comparisons of fully winged and vestigial-winged morphotypes of *Z.*

836 *fenestrata* Clade 1 sampled in Black Jacks Creek.

## 837 **Author contributions statement**

838 AV planned and wrote the manuscript and performed the analyses, BF and JW

839 conducted the fieldwork, JW and PD envisioned and planned the project, all authors  
840 edited and redrafted the manuscript.

841

#### 842 **Competing interests**

843 We have no competing interests of any sort.

844

#### 845 **Data Accessibility**

846 All processed data from Stacks will be included on Dryad entry # XXXXXXXX

847

#### 848 **Ethical Statement**

849 All experiments were performed in accordance with University of Otago ethics

850 committee regulations and guidelines.

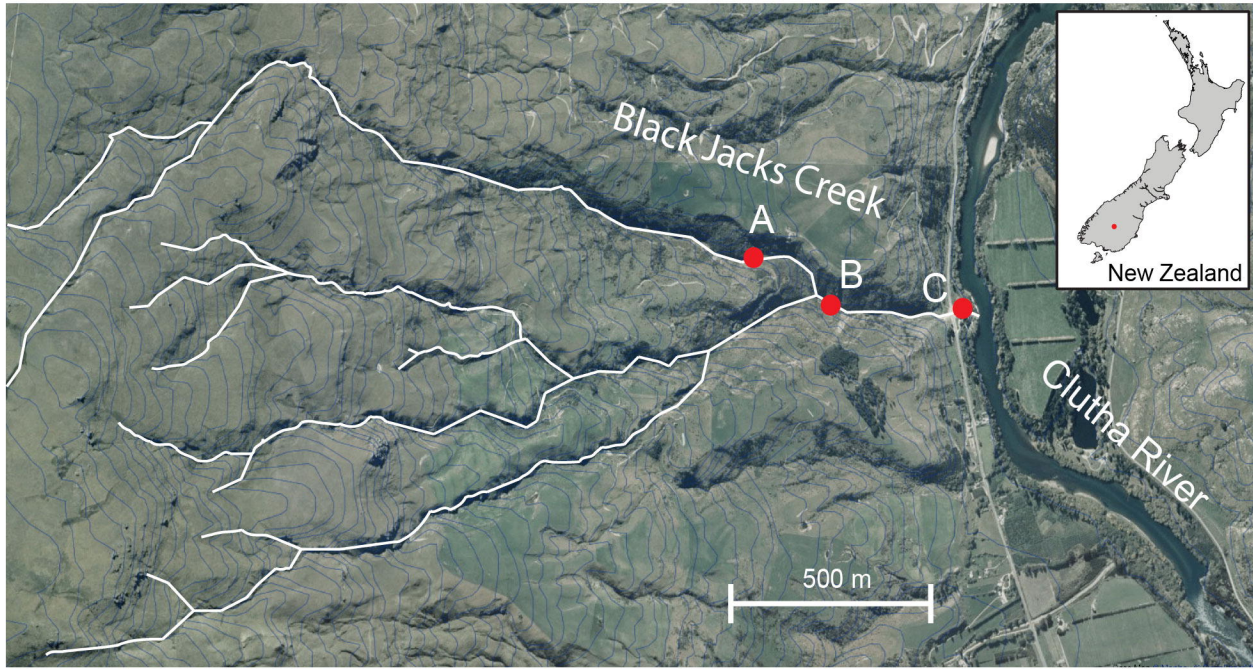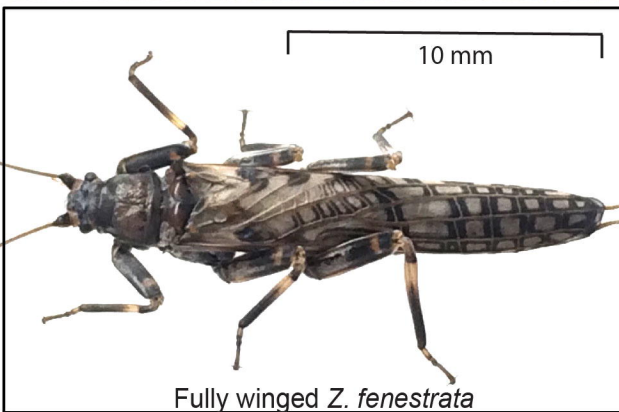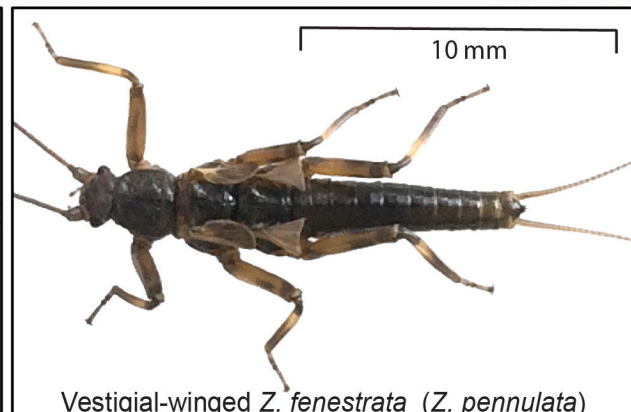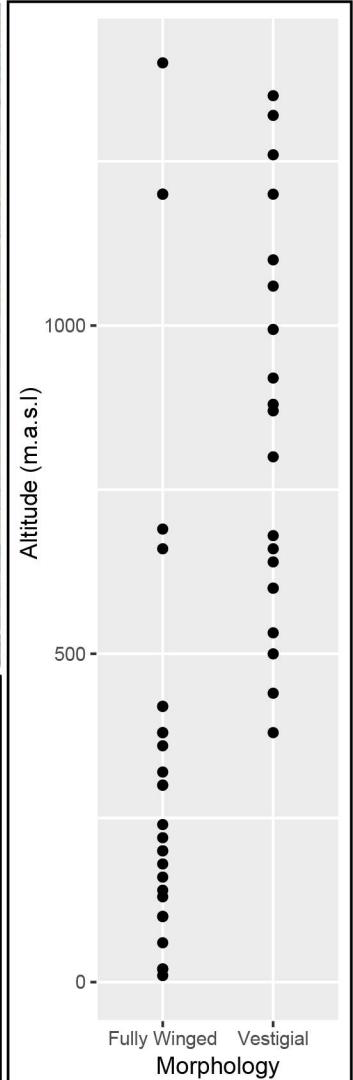

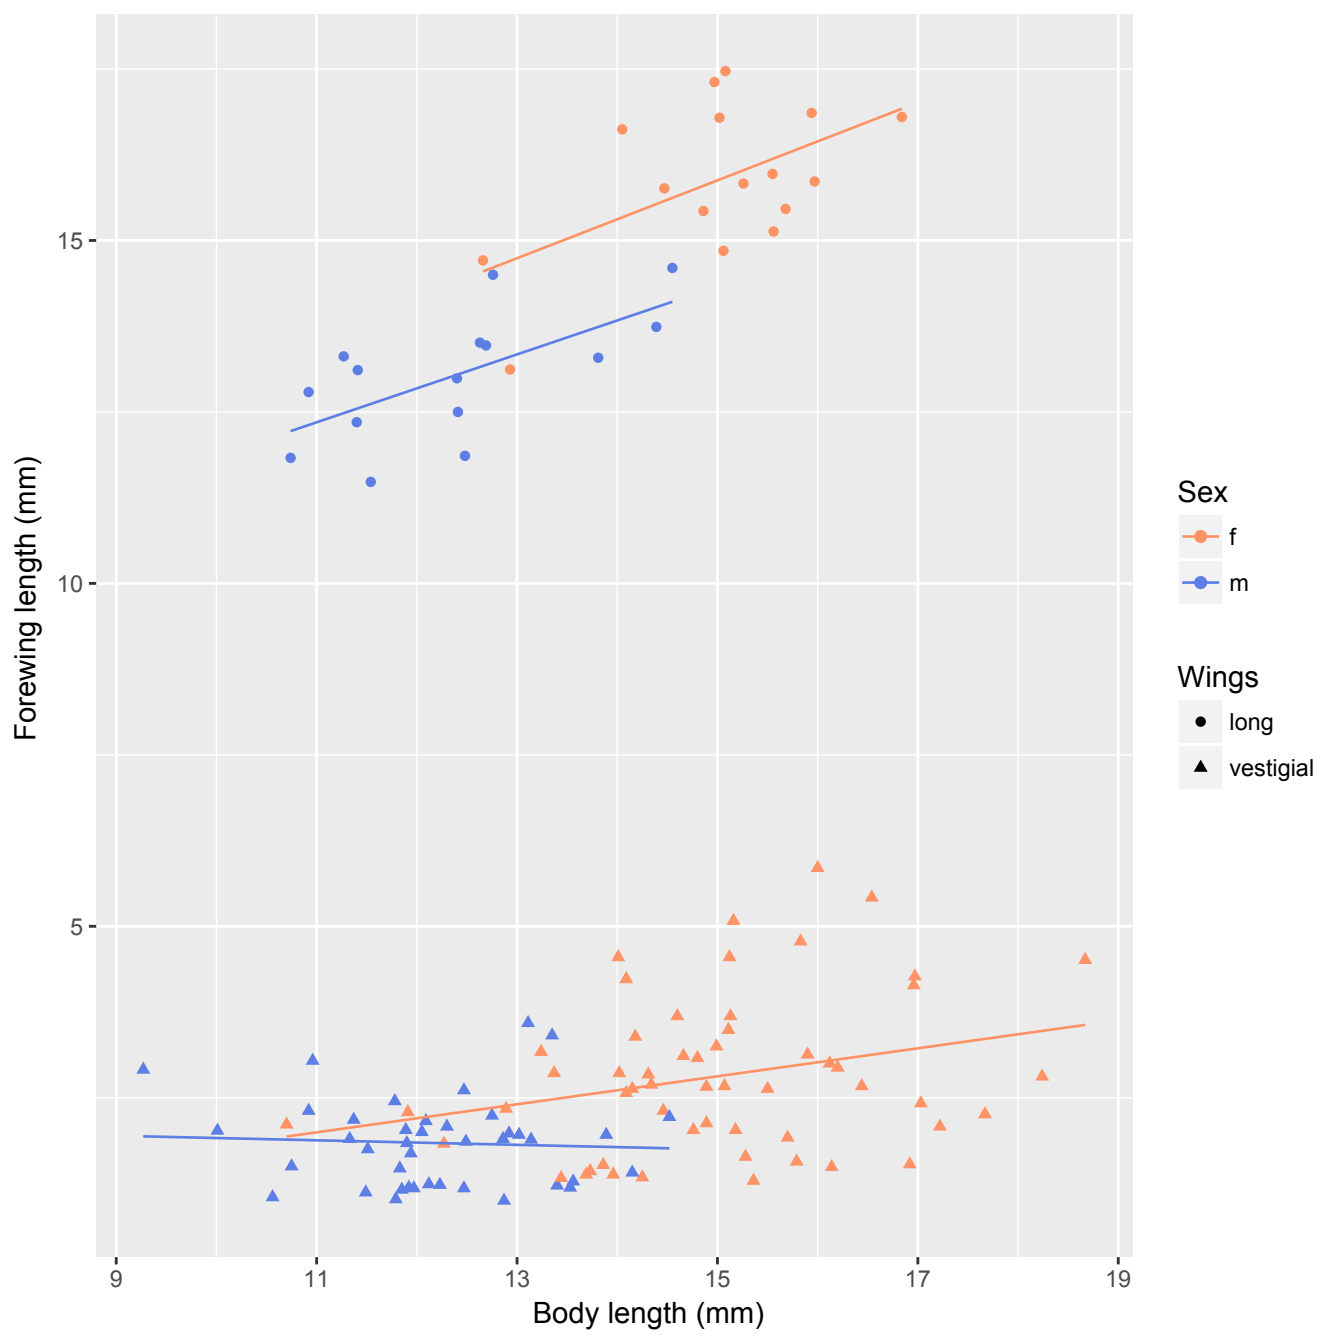



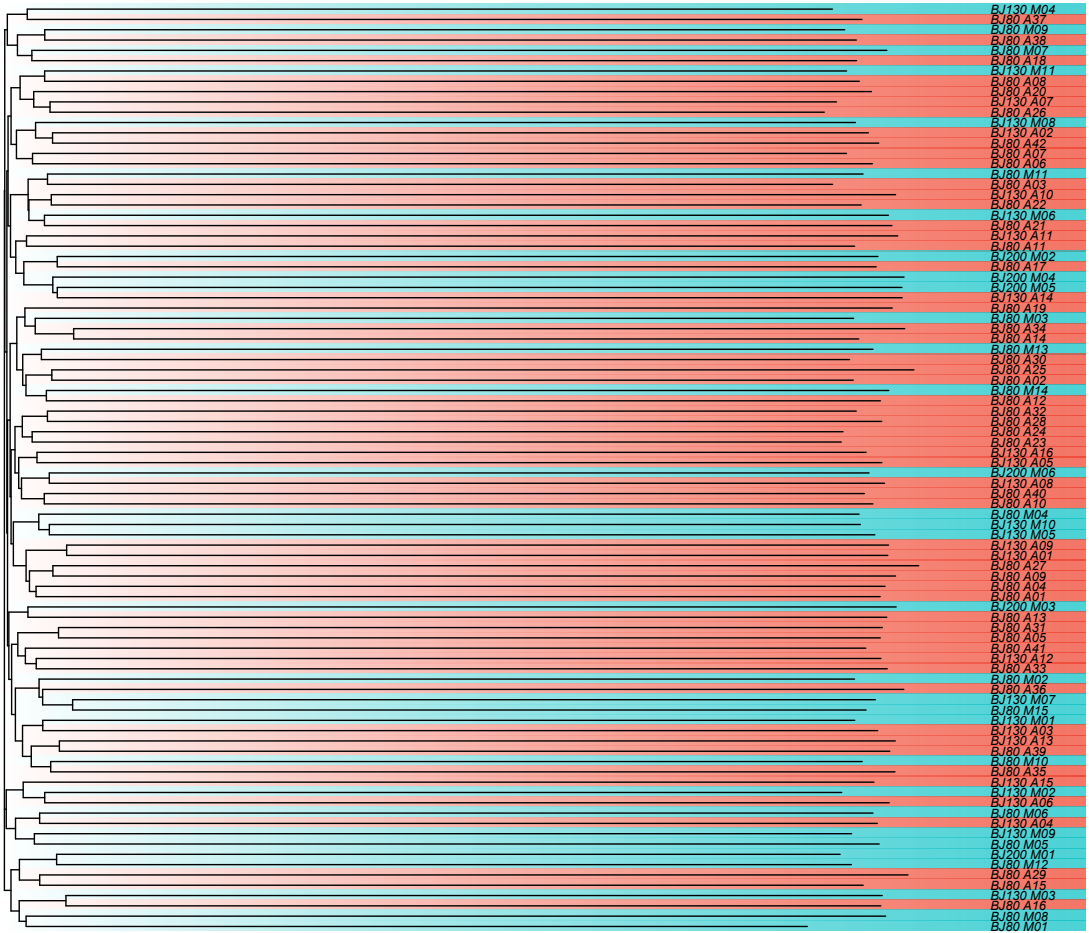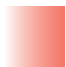

Vestigial-winged

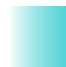

Fully winged

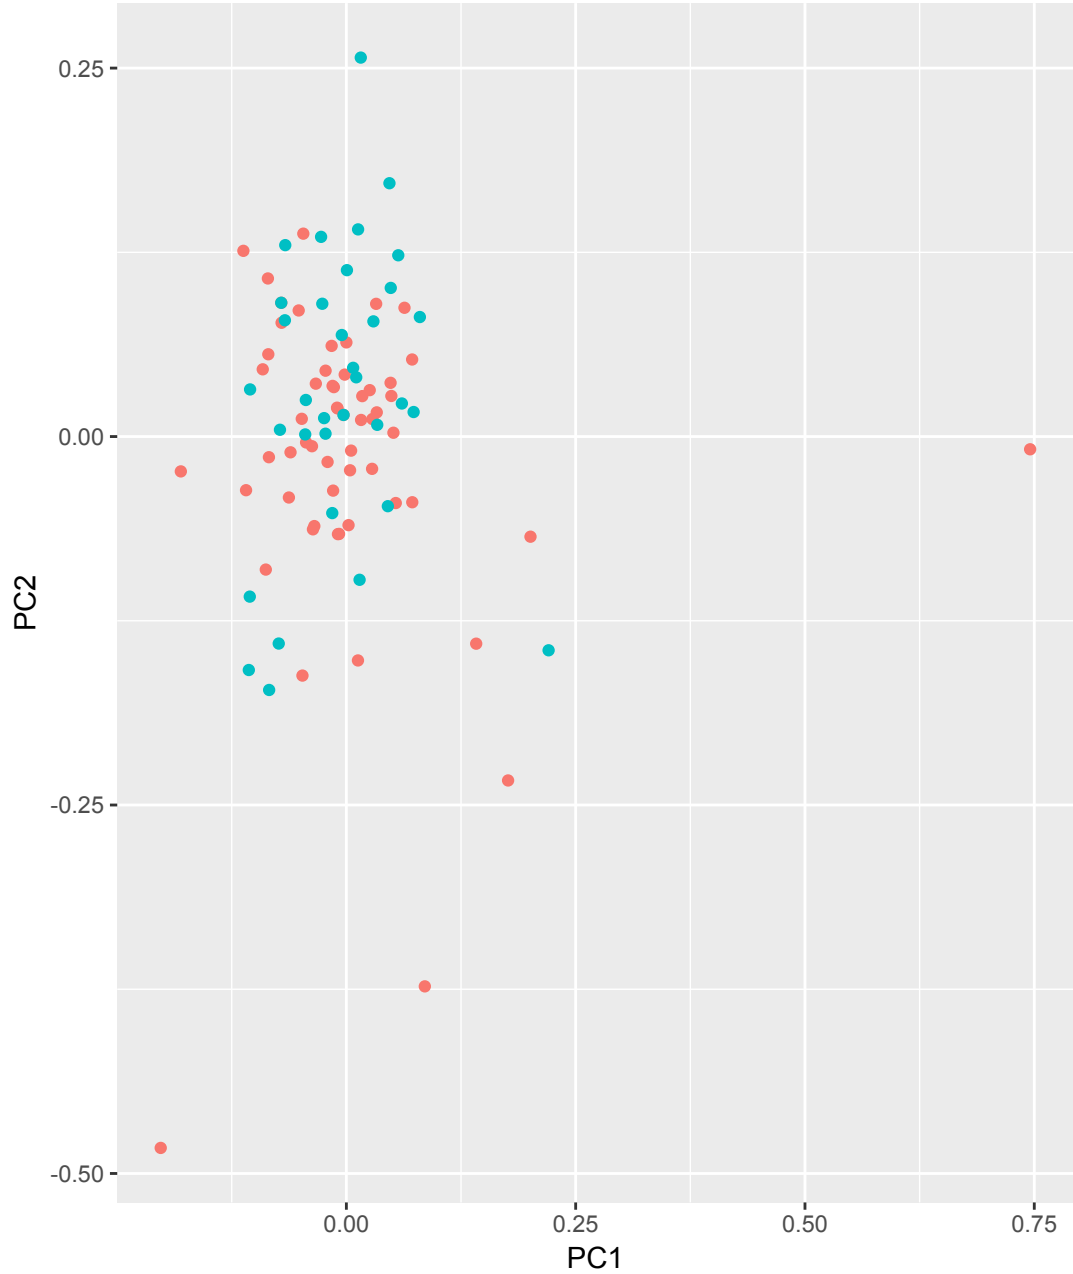

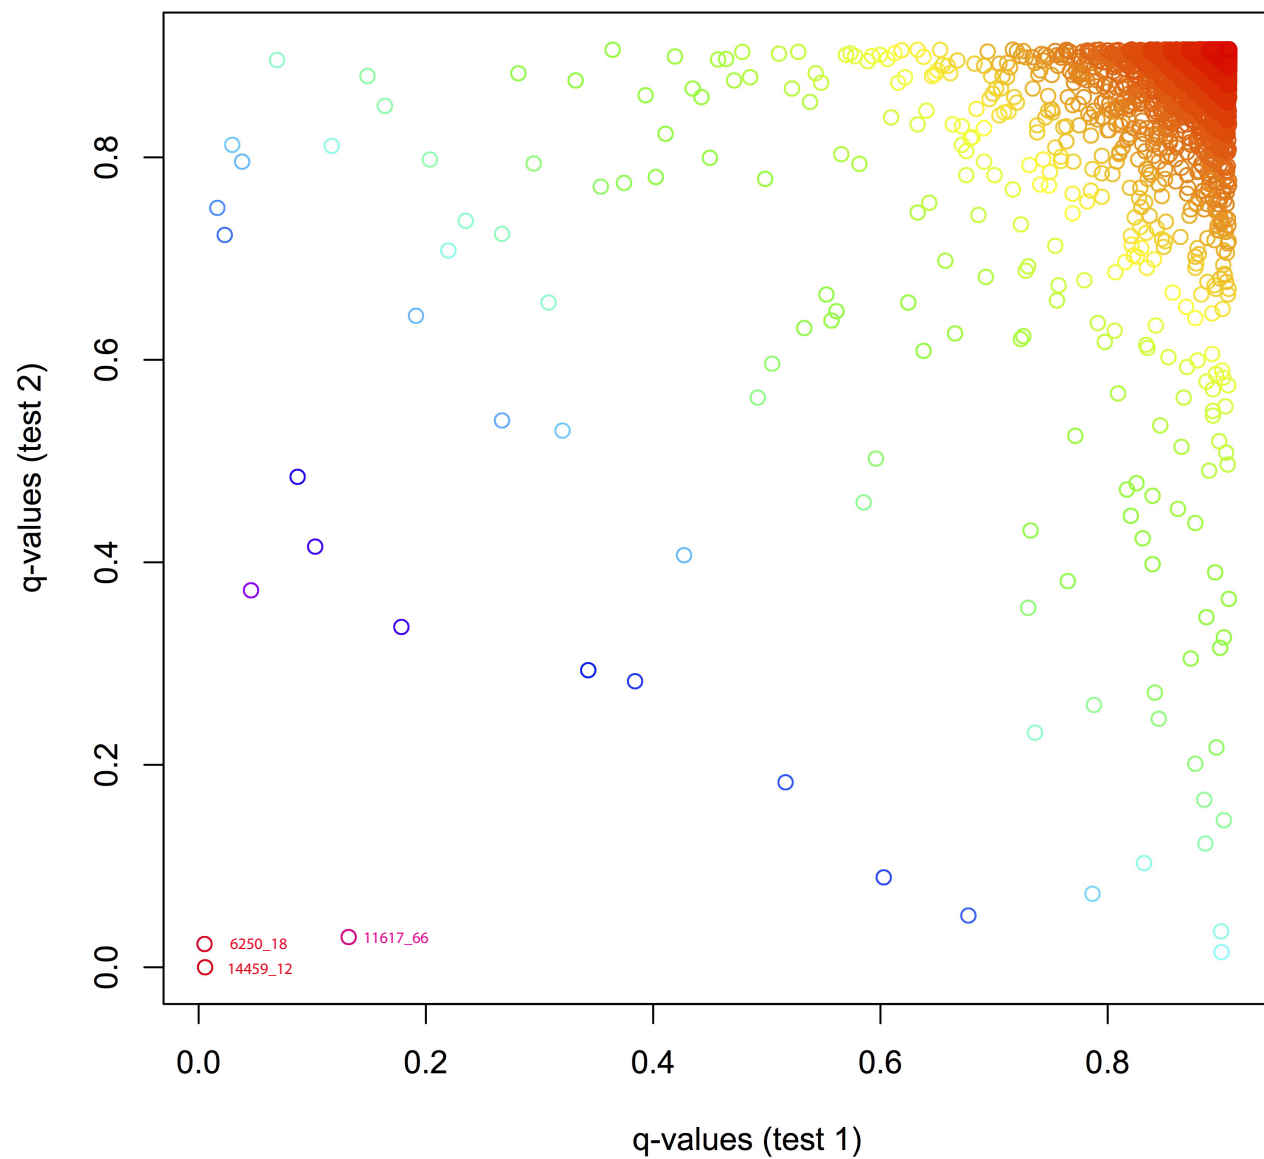

Source: https://www.biorxiv.org/content/10.1101/264473v1.full.pdf
